# Supplementary material for: Optimization of the Active Layer P3HT:PCBM for Organic Solar Cell
Source: MDPI journal article supplement (doi:10.3390/coatings11070863), 2021-07-19
Supplement: s1 [file coatings-1293512-supplementary.pdf › coatings-1293512-supplementary.pdf]

# Supplementary Materials: Optimization of the Active Layer P3HT:PCBM for Organic Solar Cell

Mohamed Shaban <sup>1</sup>, Mohamed Benghanem <sup>1,\*</sup>, Abdullah Almohammed <sup>1</sup> and Mohamed Rabia <sup>2,3</sup>

<sup>1</sup> Physics Department, Faculty of Science, Islamic University of Madinah, P.O. Box 170, Madinah 42351, Saudi Arabia; mssfadel@yahoo.com (M.S.); ard.almohammed@hotmail.com (A.A.)

<sup>2</sup> Nanophotonics and Applications Laboratory, Physics Department, Faculty of Science, Beni-Suef University, Beni-Suef 62514, Egypt; mohamedchem@science.bsu.edu.eg

<sup>3</sup> Polymer Research Laboratory, Chemistry Department, Faculty of Science, Beni-Suef University, Beni-Suef 62514, Egypt

\* Correspondence: benghanem\_mohamed@yahoo.fr; Tel.: +966-507346783

**Citation:** Shaban, M.; Benghanem, M.; Almohammed, A.; Rabia, M. Optimization of the Active Layer P3HT:PCBM for Organic Solar Cell. *Coatings* **2021**, *11*, 863. <https://doi.org/10.3390/coatings11070863>

Academic Editor: Chen Tei-Chen

Received: 25 June 2021

Accepted: 15 July 2021

Published: 19 July 2021

**Publisher's Note:** MDPI stays neutral with regard to jurisdictional claims in published maps and institutional affiliations.

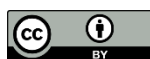

**Copyright:** © 2021 by the authors. Licensee MDPI, Basel, Switzerland. This article is an open access article distributed under the terms and conditions of the Creative Commons Attribution (CC BY) license (<http://creativecommons.org/licenses/by/4.0/>).

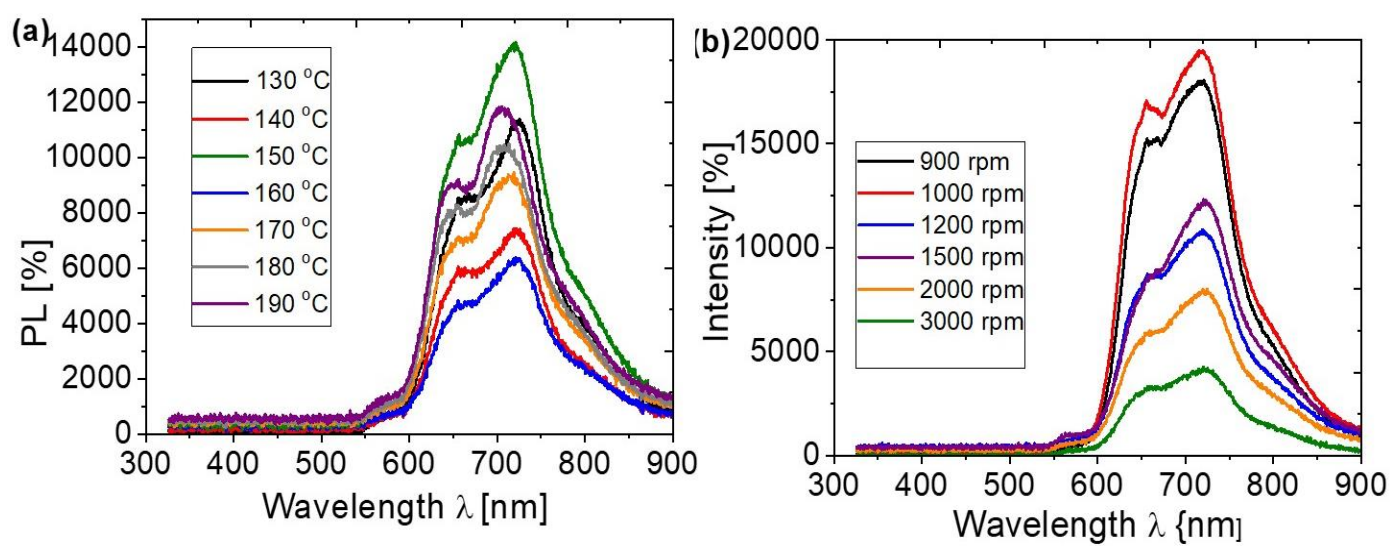

**Figure S1.** the photoluminescence of the P3HT:PCBM under (a) different annealing temperature, (b) different spin speed coating.

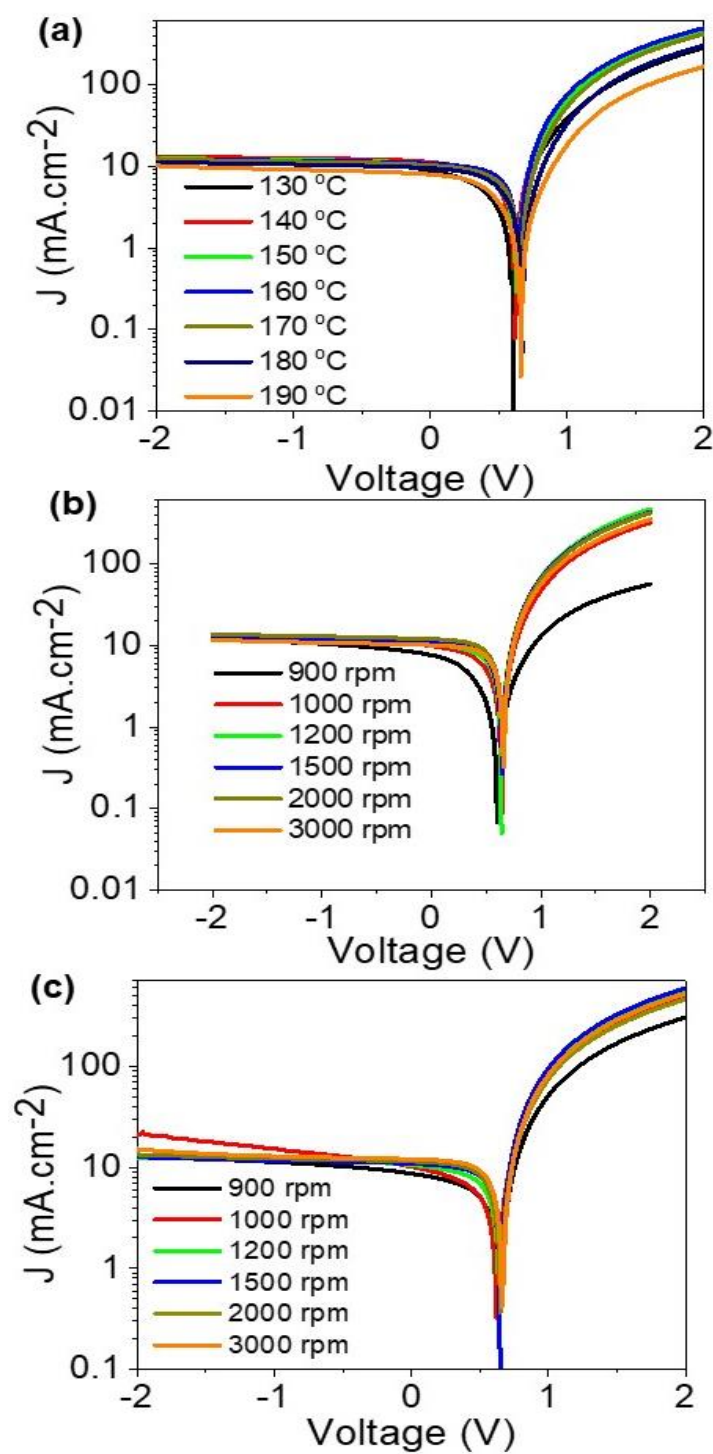

**Figure S2.** The integral values of I-V values in light for the effect of (a) annealing temperature, (b) spin speed coating using Al electrode, (c) spin speed coating using Mg-Al electrode.

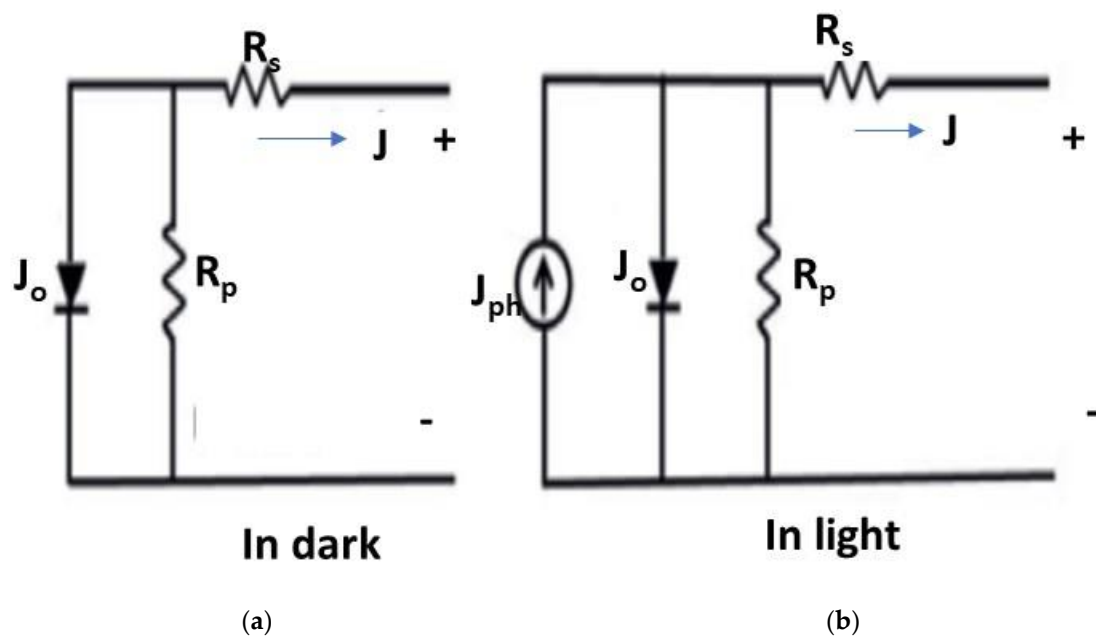

**Figure S3.** The equivalent circuit model represents  $R_s$  and  $R_p$  in (a) dark and (b) light.

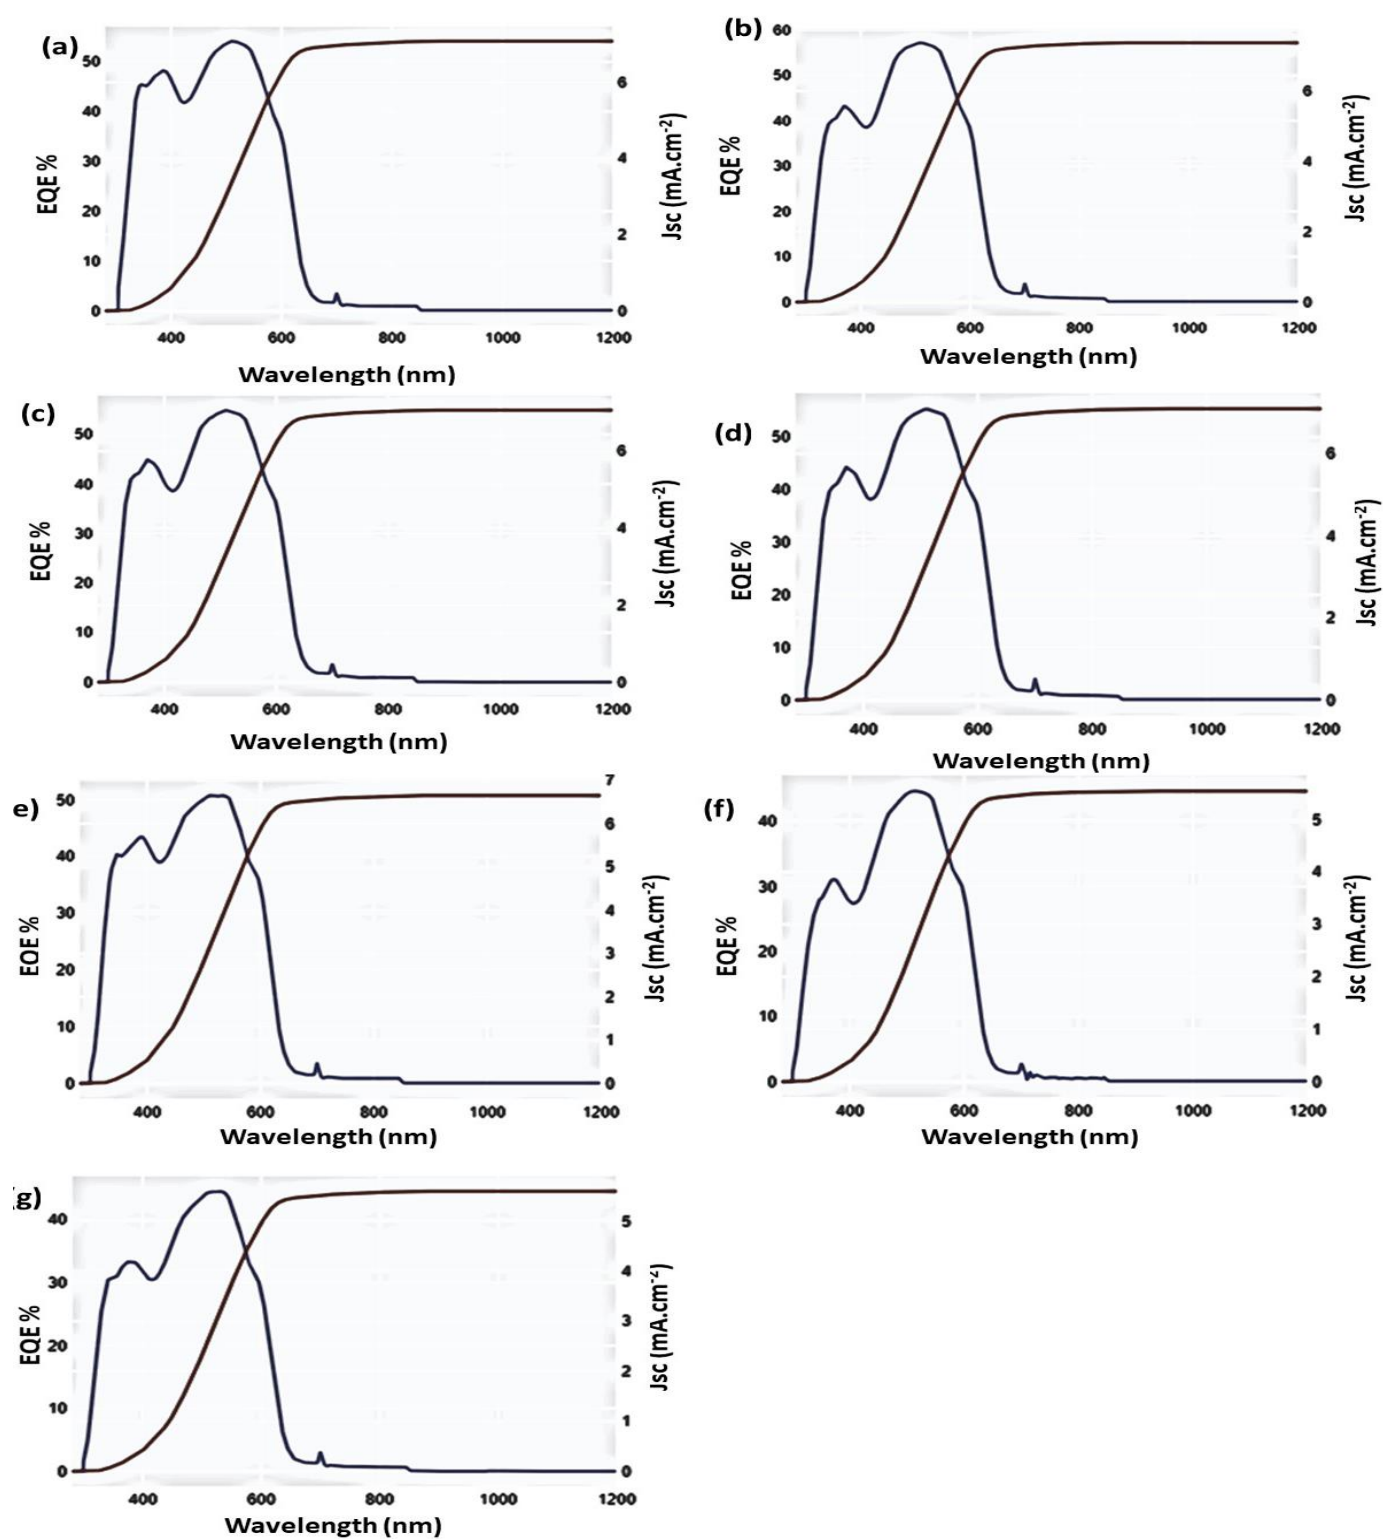

**Figure S4.** The  $J_{sc}$  and EQE relations under different wavelengths for (a) 130, (b) 140, (c) 150, (d) 160, (e) 170, (f) 180, and (g) 190 °C.

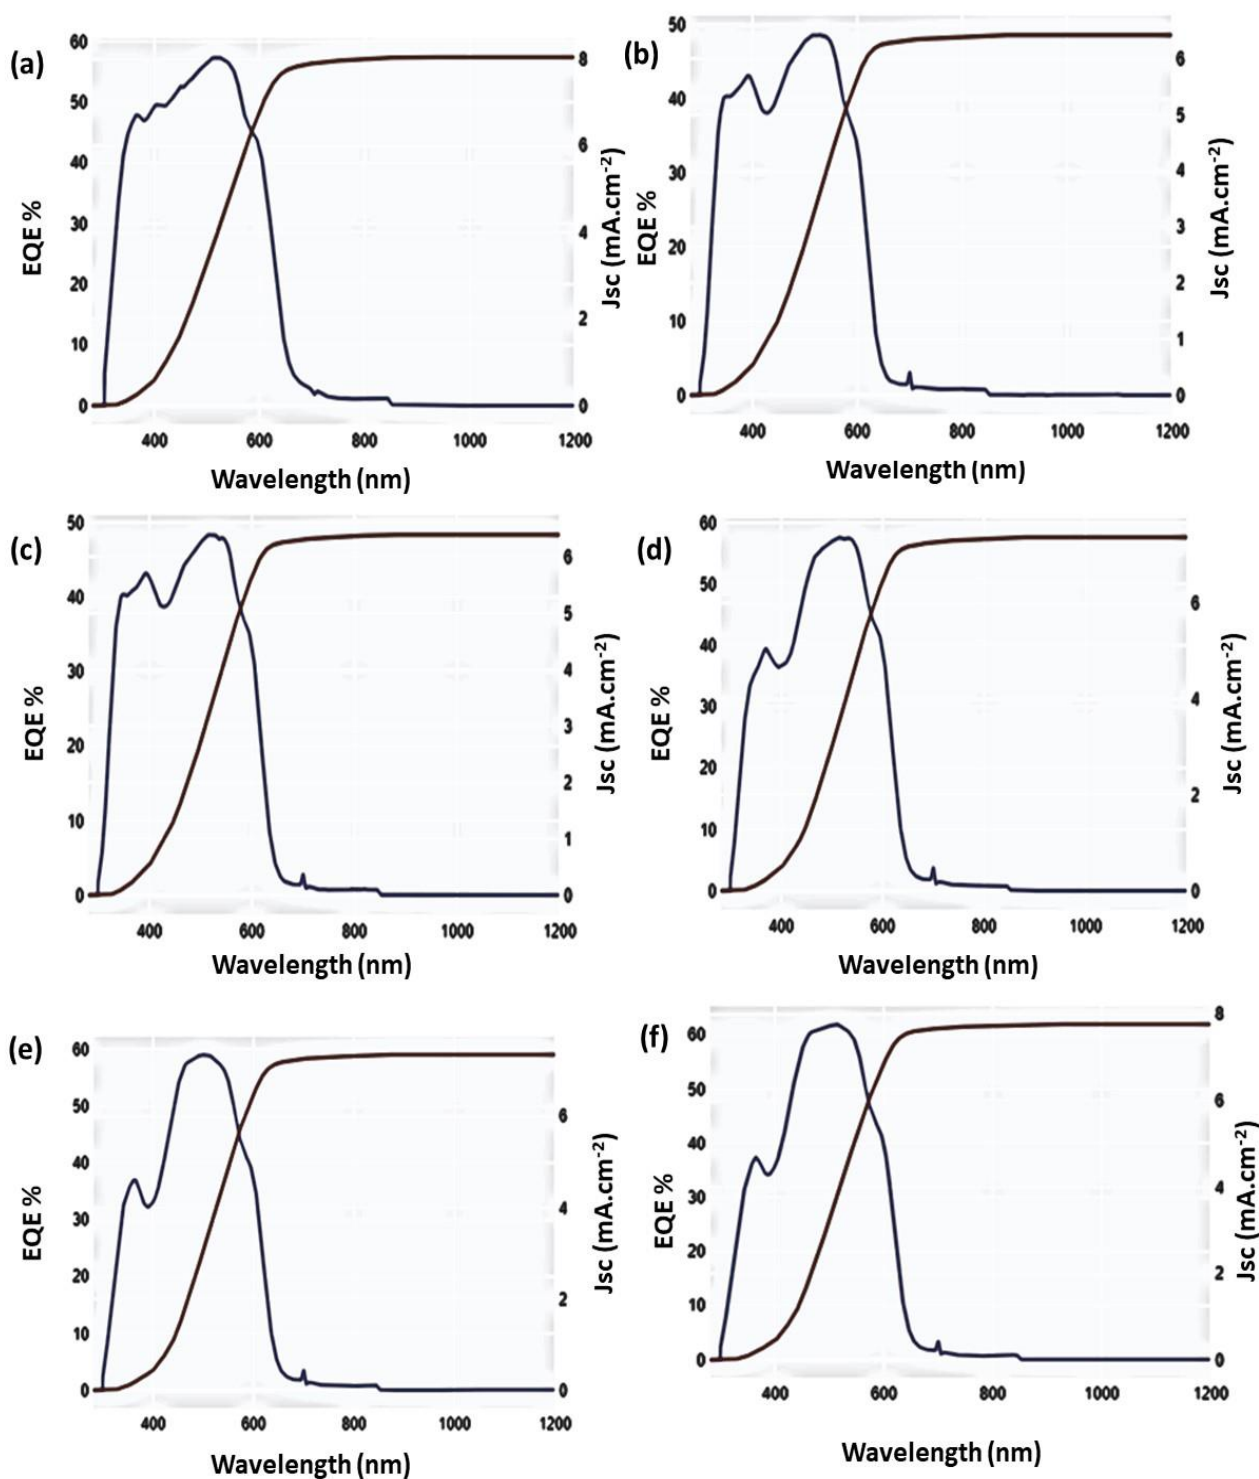

**Figure S5.** The  $J_{sc}$  and EQE relations under different wavelengths for (a) 900, (b) 1000, (c) 1200, (d) 1500, (e) 2000, and (f) 3000 rpm for the active layer using Mg-Al cathode.

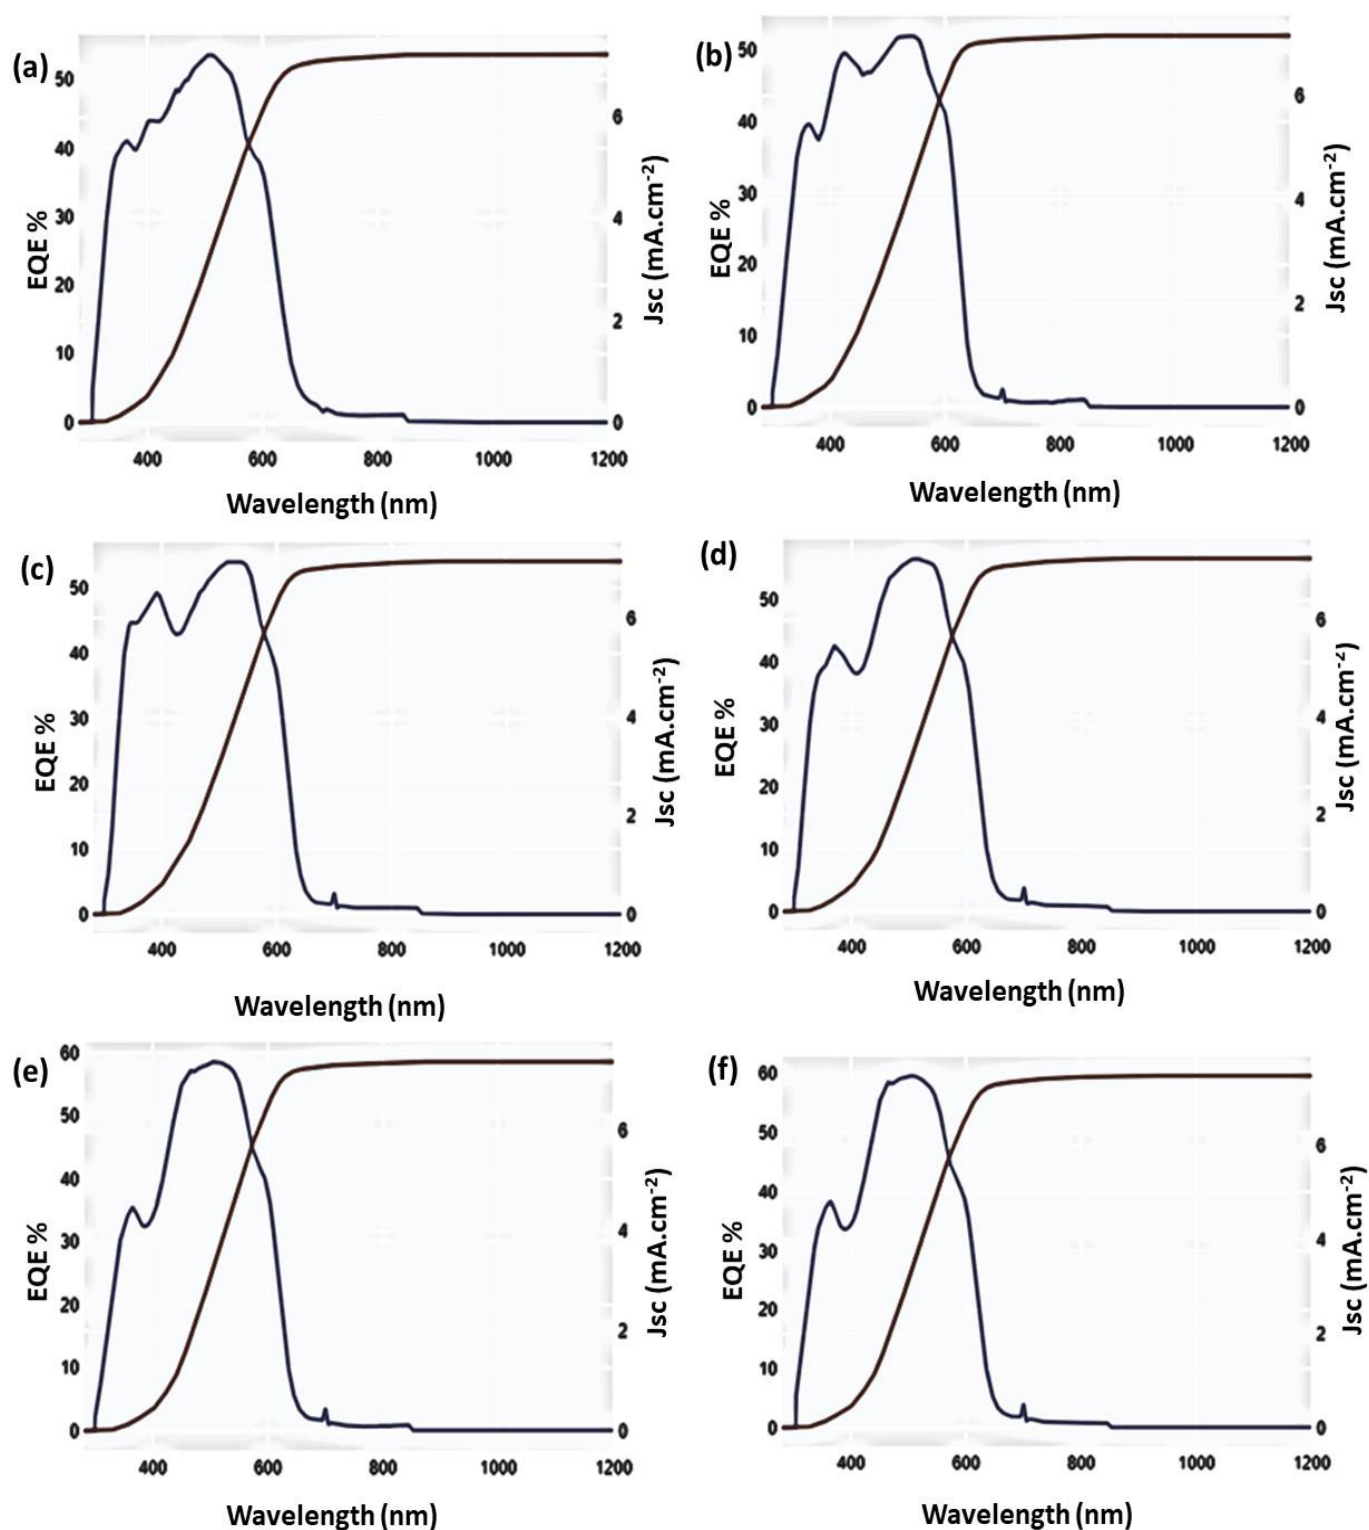

**Figure S6.** The  $J_{sc}$  and EQE relations under different wavelengths for (a) 900, (b) 1000, (c) 1200, (d) 1500, (e) 2000, and (f) 3000 rpm for the active layer using Al cathode.

**Table S1.** the  $J_{sc}$  values calculated from EQE values from Figure S4 under different annealing temperatures for the active layer.

| Annealing Temperature<br>(°C) | $J_{sc}$<br>(mA/cm <sup>2</sup> ) |
|-------------------------------|-----------------------------------|
| 130                           | 7.08                              |
| 140                           | 7.37                              |
| 150                           | 7.06                              |
| 160                           | 7.10                              |
| 170                           | 6.66                              |
| 180                           | 5.54                              |
| 190                           | 5.59                              |

**Table S2.** the  $J_{sc}$  values calculated from EQE values from Figures S5 and S6 under different spin speed coating for the active layer.

| Spin Frequency<br>(rpm) | Cathode | $J_{sc}$<br>(mA/cm <sup>2</sup> ) |
|-------------------------|---------|-----------------------------------|
| 900                     | Mg-Al   | 8.04                              |
| 1000                    | Mg-Al   | 6.42                              |
| 1200                    | Mg-Al   | 6.39                              |
| 1500                    | Mg-Al   | 7.37                              |
| 2000                    | Mg-Al   | 7.35                              |
| 3000                    | Mg-Al   | 7.76                              |
| 900                     | Al      | 7.24                              |
| 1000                    | Al      | 7.15                              |
| 1200                    | Al      | 7.14                              |
| 1500                    | Al      | 7.27                              |
| 2000                    | Al      | 7.38                              |
| 3000                    | Al      | 7.47                              |
